# Supplementary material for: Dihydroartemisinin loaded layered double hydroxide nanocomposites for tumor specific photothermal–chemodynamic therapy
Source: Royal Society of Chemistry journal article supplement (doi:10.1039/d0tb01964j), 2020-01-01
Supplement: d0tb01964j1.pdf [file d0tb01964j1.pdf]

# Supporting Information

## Dihydroartemisinin Loaded Layered Double Hydroxide

## Nanocomposites for Tumor Specific Photothermal-Chemodynamic Therapy

Jingsong Lu,<sup>a,b,c</sup> Zhenhu Guo,<sup>b,c,d</sup> Shenglei Che,<sup>a</sup> Fei Gao,<sup>b,c</sup> Zi Gu,<sup>e</sup> Jianzhong Xu,<sup>b,c</sup> Yongjie Chi,<sup>b,c,f</sup>  
Junxin Zhang,<sup>b,c</sup> Wanling Xu,<sup>b,c</sup> Nonaka Takuya<sup>b,c</sup>, Jing Yu\*<sup>a</sup> and Lingyun Zhao\*<sup>b,c</sup>

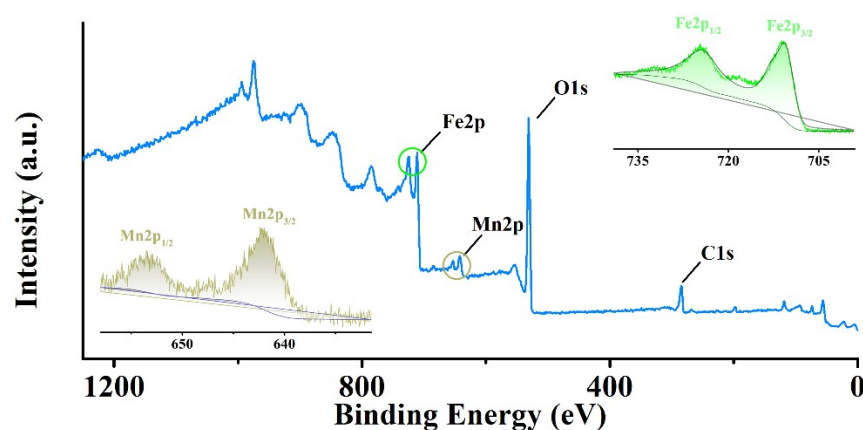

Figure. S1 XPS spectra of Fe 2p and Mn 2p orbits of MnMgFe-LDH.

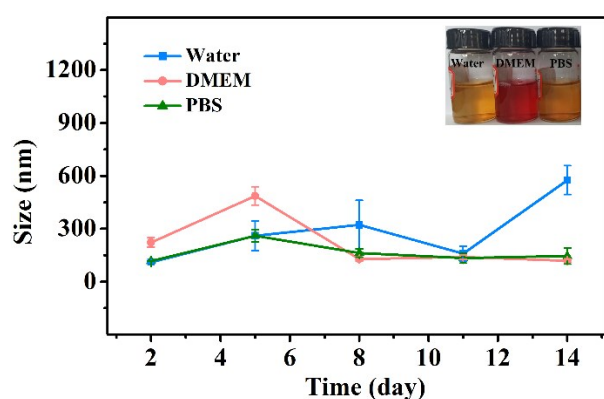

Figure. S2 Particle size of MnMgFe-LDH in water, DMEM or PBS for 14 days. Error bars represented for standard deviation, n = 3.

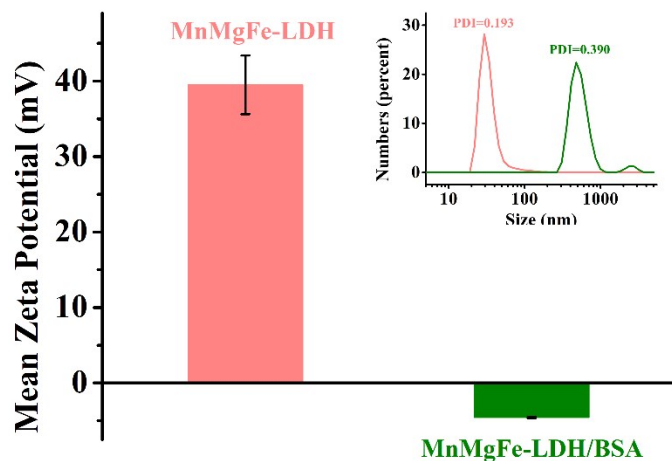

**Figure. S3** Mean Zeta potential and particle size of MnMgFe-LDH and MnMgFe-LDH/BSA

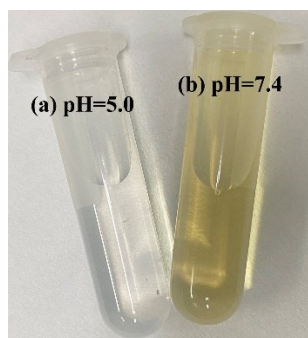

**Figure. S4** Discoloration of MnMgFe-LDH after three weeks at pH=5.0 (a) and 7.4 (b).

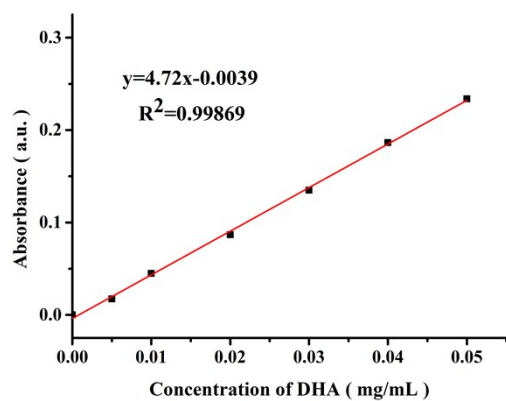

**Figure. S5** Quantitative relationship between DHA and its absorbance at 240 nm.

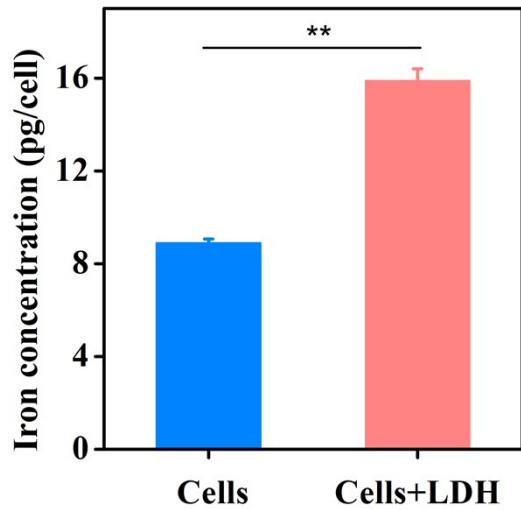

**Figure. S6** Cellular uptake through quantitative analysis of iron in tumor cells when incubated with LDH at 100  $\mu\text{g}/\text{mL}$ .

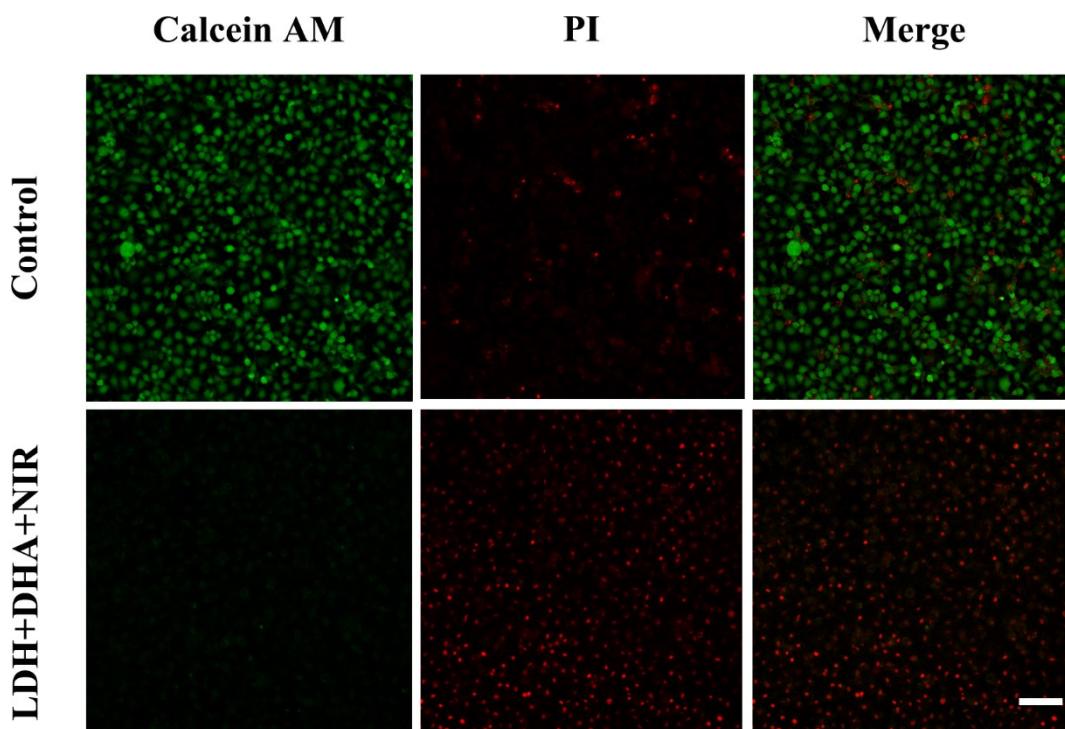

**Figure. S7** Live and dead staining after incubating for 24 h ( $[\text{LDH}] = 80 \mu\text{g}/\text{mL}$ ,  $[\text{DHA}] = 40 \mu\text{g}/\text{mL}$ , laser parameter:  $1.5 \text{ W}/\text{cm}^2$ , 5 min).

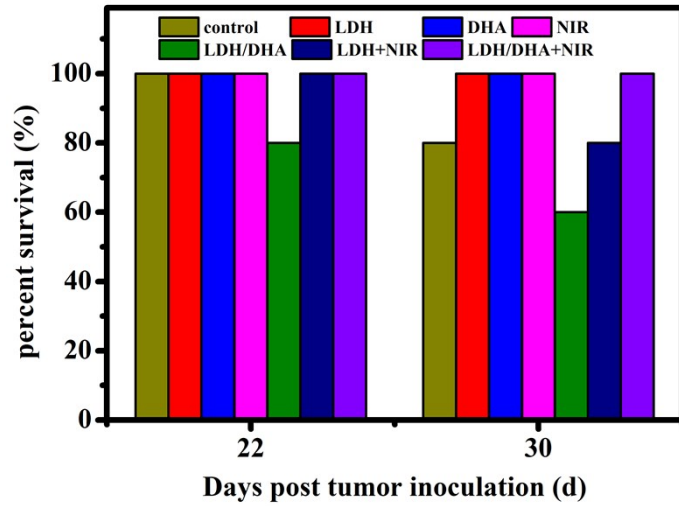

**Figure. S8** Survival rate of mice after 22 and 30 days.

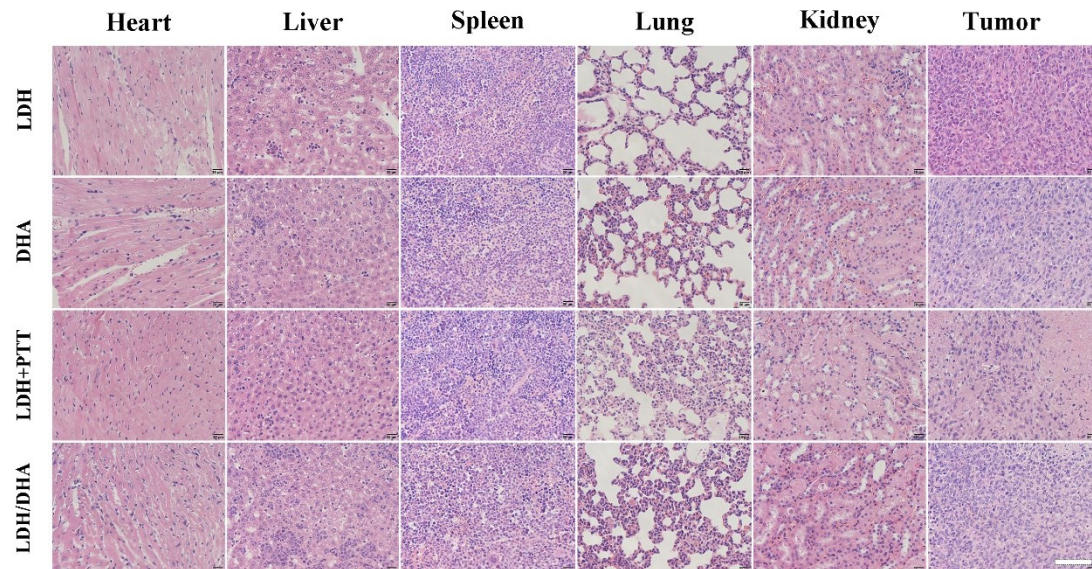

**Figure. S9** Histological evaluations of heart, liver, spleen, lung, kidney, and tumor with H&E staining in mice treated with various formulations. The scale bar is 100  $\mu$ m.

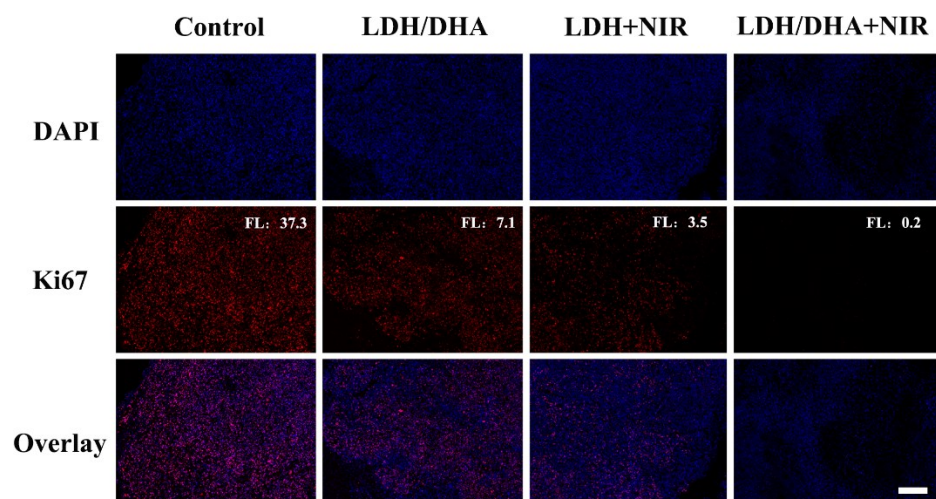

**Figure. S10** Ki67 stained tumor images of different groups (Control, LDH/DHA, LDH+NIR, LDH/DHA+NIR) after various treatments (FL: fluorescence intensity). The scale bar is 200  $\mu\text{m}$ .

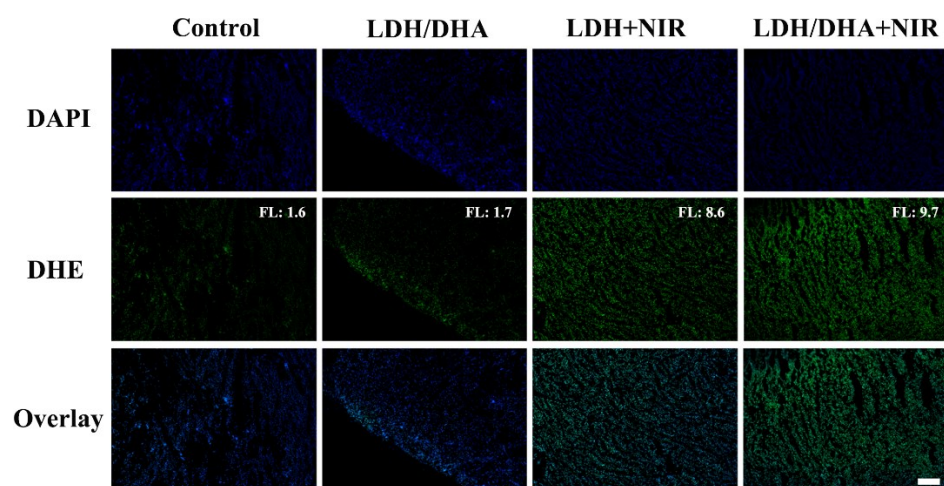

**Figure. S11** DHE stained tumor images of different groups (Control, LDH/DHA, LDH+NIR, LDH/DHA+NIR) after various treatments for ROS detection (FL: fluorescence intensity). The scale bar is 200  $\mu\text{m}$ .
